# Supplementary material
Source: MDPI journal article supplement (https://www.mdpi.com/1424-2818/15/6/774)
Supplement: s1 [file s1]

## Supplementary Materials

### Supplement S1. Analysis of variance tables

**Table S1.** Summary of permutational multivariate analysis of variance (PERMANOVA), based on Bray-Curtis dissimilarity for square-root transformed count data, examining the effect of the fixed factors Site (SP15 and SP18) and Season (winter, spring, summer, and fall) on (A) substratum type percent cover based on six categories: live rhodolith, dead rhodolith, sediment, shell, pebble, and cobble/boulder), (B) rhodolith shape distribution based on ten shape classes: compact, compact-platy, platy, very-platy, compact-bladed, bladed, very-bladed, compact-elongate, elongate, very-elongate, and (C) rhodolith macrofaunal community based on 52 taxa. All analyses were performed on balanced design using Type I sums of squares and a 5% significance level ( $\alpha = 0.05$ ).

| Source of variation | df | MS    | Pseudo- <i>F</i> | <i>p</i> (perm) |
|---------------------|----|-------|------------------|-----------------|
| A. Substratum type  |    |       |                  |                 |
| Site                | 1  | 0.025 | 7.717            | < 0.001         |
| Season              | 3  | 0.010 | 3.080            | 0.003           |
| Site x Season       | 3  | 0.005 | 1.381            | 0.211           |
| Residuals           | 16 | 0.003 |                  |                 |
| Total               | 23 |       |                  |                 |
| B. Rhodolith shape  |    |       |                  |                 |
| Site                | 1  | 0.058 | 3.875            | 0.014           |
| Season              | 3  | 0.041 | 2.737            | 0.010           |
| Site x Season       | 3  | 0.007 | 0.445            | 0.900           |
| Residuals           | 64 | 0.015 |                  |                 |
| Total               | 71 |       |                  |                 |
| C. Macrofauna       |    |       |                  |                 |
| Site                | 1  | 0.395 | 5.545            | < 0.001         |
| Season              | 3  | 0.248 | 3.484            | < 0.001         |
| Site x Season       | 3  | 0.118 | 1.658            | 0.071           |
| Residuals           | 64 | 0.071 |                  |                 |
| Total               | 71 |       |                  |                 |

*p*-values obtained using 9999 permutations.

**Table S2.** Summary of (A) negative binomial regression examining the effect of fixed factors Site (SP15 and SP18) and Season (winter, spring, summer, and fall) on rhodolith density, and for (B) and (C) binomial regressions examining the effect of the fixed factor Site (SP15 and SP18) on rhodolith nucleation (nucleated and non-nucleated) and nucleus type (pebble-nucleated and shell-nucleated), respectively. All analyses were performed on balanced design using Type I sums of squares and a 5% significance level ( $\alpha = 0.05$ ).

| Tested parameter        | GLM family        | Source        | df | Dev     | Resid.df | Resid. Dev | <i>p</i> (>Chi) |
|-------------------------|-------------------|---------------|----|---------|----------|------------|-----------------|
| A. Rhodolith density    | Negative binomial | Null          |    |         | 71       | 82.642     |                 |
|                         |                   | Site          | 1  | 1.768   | 70       | 80.874     | 0.184           |
|                         |                   | Season        | 3  |         | 67       | 75.048     | 0.120           |
|                         |                   | Site x Season | 3  |         | 64       | 73.126     | 0.589           |
| B. Rhodolith nucleation | Binomial          | Null          |    |         | 71       | 218.220    |                 |
|                         |                   | Site          | 1  | 0.134   | 70       | 218.090    | 0.715           |
| C. Nucleus type         | Binomial          | Null          |    |         | 71       | 624.350    |                 |
|                         |                   | Site          | 1  | 463.930 | 70       | 160.410    | < 0.001         |

Null = null model (intercept only); Resid. *df* = residual degrees of freedom; Resid. Dev = residual deviance

**Table S3.** Summary of two-way ANOVAs examining the effect of the fixed factors Site (SP15 and SP18) and Seasons (winter, spring, summer, and fall) on (A) rhodolith biomass, and (B) total rhodolith volume per 30 x 30-cm quadrat (0.09 m<sup>2</sup>). All analyses were performed on balanced design using Type I sums of squares and a 5% significance level ( $\alpha = 0.05$ ).

| Source        | df | (A) Rhodolith biomass |         |          | (B) Rhodolith volume |         |          |
|---------------|----|-----------------------|---------|----------|----------------------|---------|----------|
|               |    | MS                    | F-value | <i>p</i> | MS                   | F-value | <i>p</i> |
| Site          | 1  | 6299                  | 0.053   | 0.821    | 1663151              | 4.547   | 0.037    |
| Season        | 3  | 893920                | 2.448   | 0.072    | 400282               | 1.094   | 0.358    |
| Site x Season | 3  | 383279                | 1.050   | 0.377    | 202501               | 0.554   | 0.648    |
| Residuals     | 64 | 7790578               |         |          | 365747               |         |          |
| Total         | 71 |                       |         |          |                      |         |          |

**Table S4.** Summary of negative binomial linear models (applied to non-transformed count data) examining the effect of the fixed factors Site (SP15 and SP18) and Season (winter, spring, summer, and fall), and covariate Volume (total rhodolith volume per 30 x 30-cm quadrat) on macrofaunal density. Analysis was performed on balanced design using Type I sums of squares and a 5% significance level ( $\alpha = 0.05$ ).

| Source          | df | Res <i>df</i> | Dev     | Res Dev | <i>p</i> (>Chi) |
|-----------------|----|---------------|---------|---------|-----------------|
| Null            |    | 70            |         | 239.683 |                 |
| Volume          | 1  | 69            | 135.293 | 104.390 | < 0.001         |
| Site            | 1  | 68            | 0.004   | 104.386 | 0.951           |
| Season          | 3  | 65            | 12.401  | 91.985  | 0.006           |
| Volume x Site   | 1  | 64            | 0.386   | 91.599  | 0.534           |
| Volume x Season | 3  | 61            | 19.573  | 72.026  | <0.001          |

**Table S5.** Summary of ANCOVAs examining the effect of the fixed factors Site (SP15 and SP18) and Season (winter, spring, summer, and fall), and covariate Volume (total rhodolith volume per 30 x 30-cm quadrat) on macrofaunal biomass (wet weight). Analysis was performed using Type I sums of squares and a 5% significance level ( $\alpha = 0.05$ ).

| Source          | df | MS      | F     | <i>p</i> |
|-----------------|----|---------|-------|----------|
| Volume          | 1  | 40.16   | 0.169 | 0.684    |
| Site            | 1  | 1963.70 | 8.155 | 0.006    |
| Season          | 3  | 751.17  | 3.120 | 0.032    |
| Volume x Site   | 1  | 6.76    | 0.028 | 0.867    |
| Volume x Season | 3  | 382.63  | 1.589 | 0.201    |
| Residuals       | 61 | 240.79  |       |          |

**Table S6.** Summary of ANCOVAs examining the effect of the fixed factors Site (SP15 and SP18) and Season (winter, spring, summer, and fall), and covariate Volume (total rhodolith volume per 30 x 30-cm quadrat) on rhodolith macrofaunal community Shannon diversity index (H). Analysis was performed using Type I sums of squares and a 5% significance level ( $\alpha = 0.05$ ).

| Source          | df | MS    | F      | <i>p</i> |
|-----------------|----|-------|--------|----------|
| Volume          | 1  | 0.002 | 0.097  | 0.757    |
| Site            | 1  | 0.429 | 18.523 | <0.001   |
| Season          | 3  | 0.031 | 1.322  | 0.276    |
| Volume x Site   | 1  | 0.160 | 6.908  | 0.011    |
| Volume x Season | 3  | 0.026 | 1.118  | 0.349    |
| Res             | 61 | 0.023 |        |          |

## Supplement S2. List and abundance of macrofaunal taxa

**Table S7.** Macrofauna taxa identified in the St. Philip's rhodolith bed. Numbers indicate mean density ( $\pm$ SE) per 30 x 30-cm quadrat (0.09 m<sup>2</sup>) at the two study sites (SP15 and SP18; data pooled across seasons), and in each sampling season (data pooled across sites) (see Table 1 for collection dates). Zero (0) values indicate absence for a given collection. Crosses (x) indicate sponge taxa that were present but not tallied because of fragmentation. Polychaete species listed under family names were identified from subsamples but not tallied for quantitative analyses.

| Taxa                                                         | SP15       | SP18       | Winter     | Spring     | Summer     | Fall       |
|--------------------------------------------------------------|------------|------------|------------|------------|------------|------------|
| <b>Echinodermata</b>                                         |            |            |            |            |            |            |
| <u>Asteroidea</u>                                            |            |            |            |            |            |            |
| <i>Ophiura robusta</i> (Ayres, 1852)                         | 137 (12)   | 148 (15)   | 131 (18)   | 170 (19)   | 124 (16)   | 145 (21)   |
| <i>Ophiopholis aculeata</i> (Linnaeus, 1767)                 | 119 (19)   | 103 (14)   | 98 (16)    | 104 (14)   | 66 (11)    | 176 (38)   |
| <i>Asterias rubens</i> (Linnaeus, 1758)                      | 17.4 (1.5) | 12.8 (1.0) | 14.9 (2.3) | 14.9 (1.6) | 14.9 (1.1) | 15.7 (2.3) |
| <i>Crossaster papposus</i> (Linnaeus, 1767)                  | 0.1 (0.1)  | 0.1 (0.1)  | 0.2 (0.1)  | 0.1 (0.1)  | 0.1 (0.1)  | 0.1 (0.1)  |
| <u>Echinoidea</u>                                            |            |            |            |            |            |            |
| <i>Strongylocentrotus droebachiensis</i> (O.F. Müller, 1776) | 26.3 (1.6) | 24.4 (1.9) | 23.7 (2.6) | 26.7 (2.4) | 26.1 (2.3) | 24.9 (2.8) |
| <u>Holothuroidea</u>                                         |            |            |            |            |            |            |
| <i>Cuccumaria frondosa</i> (Gunnerus, 1767)                  | 0.3 (0.1)  | 0.3 (0.1)  | 0.3 (0.2)  | 0.4 (0.2)  | 0.2 (0.1)  | 0.3 (0.2)  |
| <i>Psolus fabricii</i>                                       | 0.1 (0.0)  | 0.1 (0.1)  | 0          | 0.1 (0.1)  | 0.2 (0.1)  | 0.2 (0.1)  |
| <b>Mollusca</b>                                              |            |            |            |            |            |            |
| <u>Polyplacophora</u>                                        |            |            |            |            |            |            |
| <i>Tonicella marmorea</i> (O. Fabricius, 1780)               | 117 (9)    | 77 (6)     | 94 (12)    | 128 (14)   | 85 (9)     | 84 (9)     |
| <i>Stenosemus albus</i> (Linnaeus, 1767)                     | 20.9 (2.2) | 34.1 (2.7) | 20.3 (2.7) | 32.0 (4.7) | 29.8 (3.3) | 27.9 (3.9) |
| <u>Gastropoda</u>                                            |            |            |            |            |            |            |
| <i>Boreocingula castanea</i> (Møller, 1842)                  | 9.9 (1.6)  | 2.7 (0.6)  | 6.7 (1.9)  | 5.6 (1.4)  | 4.4 (1.2)  | 8.4 (2.8)  |

| Taxa                                            | SP15        | SP18        | Winter     | Spring     | Summer     | Fall       |
|-------------------------------------------------|-------------|-------------|------------|------------|------------|------------|
| <i>Buccinum</i> sp.                             | 0.3 (0.1)   | 0.3 (0.1)   | 0.3 (0.1)  | 0.3 (0.1)  | 0.2 (0.1)  | 0.3 (0.2)  |
| <i>Diaphana minuta</i> (T. Brown, 1827)         | 2.1 (0.4)   | 2.4 (0.4)   | 1.9 (0.5)  | 1.3 (0.2)  | 3.6 (0.7)  | 2.2 (0.6)  |
| <i>Ecrobia truncata</i> (Vanatta, 1924)         | 2.5 (0.6)   | 1.9 (0.5)   | 3.1 (0.9)  | 1.7 (0.3)  | 0.6 (0.2)  | 3.3 (1.1)  |
| <i>Lacuna vincta</i> (Montagu, 1823)            | 1.1 (0.3)   | 0.8 (0.2)   | 0.5 (0.2)  | 0.3 (0.2)  | 2.1 (0.6)  | 0.8 (0.3)  |
| <i>Littorina</i> sp.                            | < 0.1 (0.0) | 0.1 (0.0)   | 0.1 (0.1)  | 0          | 0.1 (0.1)  | 0          |
| <i>Margarites costalis</i> (Gould, 1841)        | 10.1 (1.0)  | 6.9 (0.8)   | 8.4 (0.9)  | 8.5 (1.1)  | 7.9 (1.2)  | 9.1 (1.8)  |
| <i>Margarites helycinus</i> (Phipps, 1774)      | 0.2 (0.1)   | 0.1 (0.0)   | 0.2 (0.1)  | 0.1 (0.1)  | 0.1 (0.1)  | 0.3 (0.1)  |
| <i>Moelleria costulata</i> (Möller, 1842)       | 12.1 (1.6)  | 9.0 (1.2)   | 16.5 (2.5) | 11.9 (1.5) | 5.4 (1.1)  | 8.3 (1.7)  |
| <i>Oenopota</i> sp.                             | 0.1 (0.1)   | 0.1 (0.0)   | 0.1 (0.1)  | 0          | 0.1 (0.1)  | 0.2 (0.1)  |
| <i>Puncturella noachina</i> (Linnaeus, 1771)    | 41.3 (3.9)  | 33.5 (3.6)  | 46.4 (5.7) | 50.4 (5.3) | 24.1 (2.9) | 28.6 (4.6) |
| <i>Testudinalia testudinalis</i> (Müller, 1776) | 2.1 (0.3)   | 3.7 (0.4)   | 3.3 (0.4)  | 3.5 (0.7)  | 3.3 (0.6)  | 1.3 (0.4)  |
| <i>Turbonilla</i> sp.                           | 0.8 (0.2)   | 0.7 (0.1)   | 0.7 (0.2)  | 0.5 (0.2)  | 0.8 (0.2)  | 0.9 (0.3)  |
| <i>Velutina velutina</i> (O.F. Müller, 1776)    | 1.9 (0.3)   | 1.4 (0.3)   | 1.8 (0.4)  | 1.8 (0.4)  | 0.9 (0.2)  | 2.1 (0.5)  |
| <i>Dotilla</i> sp. (Stimpson, 1858)             | 0.1 (0.0)   | < 0.1 (0.0) | 0.2 (0.1)  | 0          | 0          | 0          |
| <i>Onchidoris muricata</i> (O.F. Müller, 1776)  | 0.1 (0.1)   | 0.1 (0.1)   | 0.2 (0.1)  | 0.1 (0.1)  | 0          | 0.2 (0.1)  |
| <i>Palio dubia</i> (M. Sars, 1829)              | 0.5 (0.1)   | 0.4 (0.1)   | 0.4 (0.2)  | 0          | 0          | 0.5 (0.2)  |
| <i>Nudibranchia</i> indet.                      | 4.0 (0.5)   | 4.2 (0.6)   | 3.9 (0.5)  | 1.1 (0.4)  | 5.1 (0.7)  | 6.3 (1.0)  |
| <b><u>Bivalva</u></b>                           |             |             |            |            |            |            |
| <i>Crenella decussata</i> (Montagu, 1808)       | 1.6 (0.3)   | 0.5 (0.1)   | 1.7 (0.4)  | 0.7 (0.3)  | 1.2 (0.4)  | 0.8 (0.2)  |
| <i>Cyclocardia</i> sp.                          | 0.1 (0.1)   | 0.1 (0.1)   | 0          | 0.2 (0.1)  | 0.2 (0.1)  | 0.1 (0.1)  |
| <i>Dacrydium vitreum</i> (Møller, 1842)         | 2.4 (0.7)   | 1.3 (0.3)   | 0.7 (0.3)  | 0.7 (0.2)  | 2.2 (0.9)  | 3.9 (1.1)  |
| <i>Heteranomia squamula</i> (Linnaeus, 1758)    | 2.8 (0.4)   | 2.4 (0.6)   | 1.6 (0.5)  | 3.1 (0.9)  | 1.9 (0.6)  | 3.9 (0.6)  |
| <i>Hiatella arctica</i> (Linnaeus, 1767)        | 48.3 (4.9)  | 30.5 (3.9)  | 30.2 (5.0) | 48.8 (6.6) | 35.7 (5.4) | 42.9 (8.4) |
| <i>Macoma calcarea</i> (Gmelin, 1791)           | 0           | < 0.1 (0.0) | 0.1 (0.1)  | 0          | 0          | 0          |
| <i>Modiolus modiolus</i> (Linnaeus, 1758)       | 3.4 (0.6)   | 1.3 (0.2)   | 4.7 (1.0)  | 2.8 (0.6)  | 1.1 (0.3)  | 0.7 (0.2)  |
| <i>Musculus discors</i> (Linnaeus, 1767)        | 0           | 0.2 (0.1)   | 0.1 (0.1)  | 0.1 (0.1)  | 0.1 (0.1)  | 0.1 (0.1)  |
| <i>Mytilus edulis</i> (Linnaeus, 1758)          | 0.1 (0.0)   | 0.1 (0.1)   | 0          | 0.3 (0.1)  | 0.1 (0.1)  | 0          |
| <i>Parvicardium pinnulatum</i> (Conrad, 1831)   | 0.4 (0.1)   | 0.2 (0.1)   | 0.4 (0.1)  | 0.1 (0.1)  | 0.3 (0.1)  | 0.5 (0.2)  |
| <i>Solamen glandula</i> (Totten, 1834)          | 0           | < 0.1 (0.0) | 0.1 (0.1)  | 0          | 0          | 0          |

| Taxa                                            | SP15       | SP18      | Winter     | Spring     | Summer    | Fall       |
|-------------------------------------------------|------------|-----------|------------|------------|-----------|------------|
| <i>Thyasira</i> sp.                             | 0.4 (0.1)  | 0.1 (0.1) | 0.7 (0.3)  | 0.1 (0.1)  | 0.1 (0.1) | 0.2 (0.1)  |
| <b>Annelida</b>                                 |            |           |            |            |           |            |
| <b><u>Polychaeta</u></b>                        |            |           |            |            |           |            |
| Ampharetidae (Malmgren, 1866)                   | 0.4 (0.1)  | 0.3 (0.1) | 0.4 (0.2)  | 0.7 (0.2)  | 0.1 (0.1) | 0.2 (0.1)  |
| Arenicolidae (Johnston, 1835)                   | 0.3 (0.1)  | 0.4 (0.1) | 0.3 (0.1)  | 0.8 (0.2)  | 0.1 (0.1) | 0.2 (0.1)  |
| Capitellidae (Grube, 1862)                      | 3.7 (0.6)  | 2.9 (0.5) | 3.0 (0.7)  | 4.9 (1.1)  | 2.4 (0.5) | 2.7 (0.6)  |
| Cirratulidae (Ryckholt, 1851)                   | 16.3 (1.6) | 8.4 (1.1) | 14.1 (2.6) | 15.4 (2.3) | 8.1 (1.3) | 11.7 (1.8) |
| <i>Cirratulus cirratus</i> (O. F. Müller, 1776) |            |           |            |            |           |            |
| <i>Dodecaceria concharum</i> (Örsted, 1843)     |            |           |            |            |           |            |
| <i>Polydora</i> sp. (Bosc, 1802)                |            |           |            |            |           |            |
| <i>Tharyx</i> sp. (Webster & Benedict, 1887)    |            |           |            |            |           |            |
| Flabelligeridae (de Saint-Joseph, 1894)         | 2.3 (0.4)  | 2.1 (0.4) | 2.8 (0.6)  | 1.2 (0.3)  | 1.7 (0.5) | 3.2 (0.6)  |
| <i>Flabelligera affinis</i> (M. Sars, 1829)     |            |           |            |            |           |            |
| Glyceridae (Grube, 1850)                        | 0.1 (0.0)  | 0         | 0.1 (0.1)  | 0.1 (0.1)  | 0         | 0          |
| <i>Glycera</i> sp. (Lamarck, 1818)              |            |           |            |            |           |            |
| Maldanidae (Malmgren, 1867)                     | 4.6 (0.4)  | 5.6 (0.7) | 3.9 (0.6)  | 5.7 (0.8)  | 4.8 (0.9) | 5.9 (0.9)  |
| <i>Clymenella zonalis</i> (Verrill, 1874)       |            |           |            |            |           |            |
| <i>Nicomache</i> (Malmgren, 1865)               |            |           |            |            |           |            |
| <i>Praxillella gracilis</i> (M. Sars, 1861)     |            |           |            |            |           |            |
| Nereididae (Blainville, 1818)                   | 1.7 (0.3)  | 1.3 (0.3) | 1.2 (0.3)  | 1.7 (0.4)  | 1.4 (0.4) | 1.7 (0.5)  |
| <i>Nereis zonata</i> (Malmgren, 1867)           |            |           |            |            |           |            |
| Orbiniidae (Hartman, 1942)                      | 11.7 (1.8) | 5.0 (0.8) | 9.0 (2.3)  | 9.9 (2.0)  | 5.7 (1.4) | 8.8 (2.6)  |
| <i>Naineris quadricuspida</i> (Fabricius, 1780) |            |           |            |            |           |            |
| <i>Phylo ornatus</i> (Verrill, 1873)            |            |           |            |            |           |            |
| Paraonidae (Cerruti, 1909)                      | 0.1 (0.0)  | 0         | 0          | 0.1 (0.1)  | 0.1 (0.1) | 0          |
| <i>Aricidea</i> sp. (Webster, 1879)             |            |           |            |            |           |            |
| Pectinariidae (Quatrefages, 1866)               | 0.5 (0.1)  | 0.4 (0.1) | 0.9 (0.2)  | 0.6 (0.2)  | 0.1 (0.1) | 0.1 (0.1)  |
| <i>Cistenides granulata</i> (Linnaeus, 1767)    |            |           |            |            |           |            |
| Pholoidae (Kinberg, 1858)                       | 0.2 (0.1)  | 0.1 (0.1) | 0.1 (0.1)  | 0.3 (0.2)  | 0.2 (0.1) | 0.1 (0.1)  |

| Taxa                                                           | SP15       | SP18       | Winter     | Spring     | Summer     | Fall       |
|----------------------------------------------------------------|------------|------------|------------|------------|------------|------------|
| <i>Pholoe minuta</i> (Fabricius, 1780)                         |            |            |            |            |            |            |
| Phyllodocidae (Örsted, 1843)                                   | 11.7 (1.5) | 5.3 (0.7)  | 9.4 (1.8)  | 13.8 (2.3) | 5.9 (1.3)  | 4.7 (0.7)  |
| <i>Eteone longa</i> (Fabricius, 1780)                          |            |            |            |            |            |            |
| <i>Eteone</i> sp. (Savigny, 1822)                              |            |            |            |            |            |            |
| <i>Eteone trilineata</i> (Webster & Benedict, 1887)            |            |            |            |            |            |            |
| <i>Eumida</i> sp. (Malmgren, 1865)                             |            |            |            |            |            |            |
| <i>Eulalia viridis</i> (Linnaeus, 1767)                        |            |            |            |            |            |            |
| <i>Phyllodoce</i> (Lamarck, 1818)                              |            |            |            |            |            |            |
| Polynoidae (Kinberg, 1856)                                     | 0.4 (0.1)  | 0.1 (0.1)  | 0.3 (0.2)  | 0.3 (0.1)  | 0.3 (0.2)  | 0.2 (0.1)  |
| <i>Harmothoe</i> sp. (Kinberg, 1856)                           |            |            |            |            |            |            |
| Sabellidae (Latreille, 1825)                                   | 34.3 (5.1) | 29.5 (4.6) | 24.9 (4.5) | 50.0 (7.9) | 17.8 (3.1) | 34.9 (0.3) |
| <i>Myxicola infundibulum</i> (Montagu, 1808)                   |            |            |            |            |            |            |
| <i>Pseudopotamilla reniformis</i> (Bruguère, 1789)             |            |            |            |            |            |            |
| Scalibregmatidae (Malmgren, 1867)                              | 0.9 (0.2)  | 0.1 (0.0)  | 0.9 (0.3)  | 0.3 (0.1)  | 0.3 (0.1)  | 0.3 (0.1)  |
| Serpulidae (Rafinesque, 1815)                                  | 0.7 (0.2)  | 0.2 (0.1)  | 0.4 (0.2)  | 0.7 (0.3)  | 0.1 (0.1)  | 0.6 (0.3)  |
| <i>Spirorbis (Spirorbis) spirorbis</i> (Linnaeus, 1758)        |            |            |            |            |            |            |
| Sphaerodoridae (Malmgren, 1867)                                | 0.7 (0.2)  | 0.7 (0.2)  | 0.9 (0.2)  | 0.6 (0.2)  | 0.8 (0.3)  | 0.6 (0.1)  |
| <i>Sphaerodorum gracilis</i> (Rathke, 1843)                    |            |            |            |            |            |            |
| Spionidae (Grube, 1850)                                        | 3.1 (0.5)  | 2.1 (0.3)  | 3.9 (0.6)  | 2.7 (0.6)  | 2.1 (0.6)  | 1.8 (0.5)  |
| <i>Polydora</i> sp. (Bosc, 1802)                               |            |            |            |            |            |            |
| <i>Prionospio steenstrupi</i> (Malmgren, 1867)                 |            |            |            |            |            |            |
| <i>Scolecopsis (Scolecopsis) squamata</i> (O.F. Muller, 1806)  |            |            |            |            |            |            |
| <i>Spiophanes</i> sp. (Grube, 1860)                            |            |            |            |            |            |            |
| Syllidae (Grube, 1850)                                         | 3.5 (0.7)  | 1.3 (0.2)  | 2.9 (0.8)  | 3.6 (0.9)  | 2.1 (0.9)  | 1.2 (0.3)  |
| <i>Exogone</i> sp. (Claparède 1868)                            |            |            |            |            |            |            |
| <i>Parapionosyllis longicirrata</i> (Webster & Benedict, 1884) |            |            |            |            |            |            |
| <i>Parexogone hebes</i> (Webster & Benedict, 1884)             |            |            |            |            |            |            |
| Terebellidae (Johnston, 1846)                                  | 14.9 (1.7) | 13.4 (1.5) | 14.9 (2.3) | 18.8 (2.4) | 9.2 (1.1)  | 13.7 (2.3) |
| <i>Amphitrite cirrata</i> Müller, 1776                         |            |            |            |            |            |            |
| <i>Eupolymnia</i> sp. (Verrill, 1900)                          |            |            |            |            |            |            |

| Taxa                                                      | SP15        | SP18        | Winter      | Spring    | Summer     | Fall        |
|-----------------------------------------------------------|-------------|-------------|-------------|-----------|------------|-------------|
| <i>Nicolea venustula</i> (Montagu, 1819)                  |             |             |             |           |            |             |
| <i>Polycirrus medusa</i> (Grube, 1850)                    |             |             |             |           |            |             |
| <b>Arthropoda</b>                                         |             |             |             |           |            |             |
| <u>Amphipoda</u>                                          |             |             |             |           |            |             |
| <i>Apherusa megalops</i> (Buchholz, 1874)                 | 0.3 (0.2)   | 0.3 (0.1)   | 0.1 (0.1)   | 0         | 0.8 (0.4)  | 0.2 (0.1)   |
| <i>Crassikorophium bonelliii</i> (H. Milne Edwards, 1830) | 4.9 (0.9)   | 1.4 (0.4)   | 6.0 (1.6)   | 3.2 (0.7) | 2.1 (0.6)  | 1.4 (0.4)   |
| <i>Dexamine thea</i> (Boeck, 1861)                        | 20.4 (2.7)  | 4.9 (0.9)   | 15.9 (3.6)  | 2.8 (1.1) | 12.9 (2.5) | 18.9 (4.2)  |
| <i>Hardametopa carinata</i> (Hansen, 1887)                | 2.0 (0.3)   | 0.6 (0.1)   | 0.9 (0.3)   | 0.5 (0.1) | 1.8 (0.5)  | 2.0 (0.4)   |
| <i>Ischyrocerus anguipes</i> (Krøyer, 1838)               | < 0.1 (0.0) | 0           | 0.1 (0.1)   | 0         | 0          | 0           |
| <i>Lysianassidae</i> (Dana, 1849)                         | < 0.1 (0.0) | 0.1 (0.0)   | 0.1 (0.1)   | 0         | 0          | 0.1 (0.1)   |
| <i>Orchomene</i> sp. (Boeck, 1871)                        | 0           | 0.1 (0.1)   | 0           | 0.1 (0.1) | 0          | 0           |
| <i>Phoxocephalus holbolli</i> (Krøyer, 1842)              | 0.2 (0.1)   | 0.4 (0.2)   | 0.9 (0.5)   |           | 0.2 (0.1)  | 0.1 (0.1)   |
| <i>Pleusymtes glaber</i> (Boeck, 1861)                    | 0.7 (0.5)   | 0.3 (0.1)   | 0.1 (0.1)   | 0.1 (0.1) | 0.2 (0.1)  | 1.6 (0.9)   |
| <i>Deflexilodes teselatus</i> (Schneider, 1883)           | 0.7 (0.2)   | 1.0 (0.2)   | 0.5 (0.2)   | 0.4 (0.2) | 1.0 (0.4)  | 1.4 (0.4)   |
| <i>Pontogeneia inermis</i> (Krøyer, 1838)                 | 0.3 (0.1)   | 0.7 (0.2)   | 0.1 (0.1)   | 0.6 (0.3) | 0.9 (0.4)  | 0.4 (0.1)   |
| <u>Decapoda</u>                                           |             |             |             |           |            |             |
| <i>Cancer irroratus</i> (Say, 1817)                       | 0.1 (0.0)   | 0           | 0.1 (0.1)   | 0         | 0          | 0.1 (0.1)   |
| <i>Hyas araneus</i> (Linnaeus, 1858)                      | 0.3 (0.1)   | < 0.1 (0.0) | 0.2 (0.1)   | 0.1 (0.1) | 0.3 (0.1)  | 0.1 (0.1)   |
| Hippolytidae (Spence Bate, 1888)                          | 2.8 (0.5)   | 2.0 (0.4)   | 2.9 (0.7)   | 2.2 (0.5) | 1.7 (0.4)  | 2.7 (0.8)   |
| <i>Pagurus arcuatus</i> (Squires, 1864)                   | < 0.1 (0.0) | 0           | 0           | 0         | 0          | 0.1 (0.1)   |
| <i>Pagurus pubescens</i> (Krøyer, 1838)                   | < 0.1 (0.0) | 0.1 (0.0)   | 0           | 0         | 0          | 0.2 (0.1)   |
| <i>Pagurus</i> sp. (Fabricius, 1775)                      | 0           | 0.1 (0.0)   | 0           | 0         | 0.1 (0.1)  | 0.1 (0.1)   |
| <u>Isopoda</u>                                            |             |             |             |           |            |             |
| <i>Munna</i> sp. (Krøyer, 1839)                           | 6.4 (1.3)   | 7.4 (1.6)   | 8.3 (1.4)   | 1.1 (0.4) | 2.3 (0.7)  | 16.1 (2.6)  |
| Isopoda indet.                                            | 0.1 (0.1)   | < 0.1 (0.0) | < 0.1 (0.0) | 0.1 (0.1) | 0          | < 0.1 (0.0) |
| <u>Ostracoda</u>                                          |             |             |             |           |            |             |
| Ostracoda indet.                                          | 6.2 (1.0)   | 1.2 (0.3)   | 3.4 (1.3)   | 3.8 (0.9) | 3.5 (1.2)  | 3.9 (1.3)   |



| Taxa                                                    | SP15       | SP18      | Winter     | Spring     | Summer    | Fall      |
|---------------------------------------------------------|------------|-----------|------------|------------|-----------|-----------|
| <b>Cnidaria</b>                                         |            |           |            |            |           |           |
| <i>Metridium senile</i> (Linnaeus, 1761)                | 0.1 (0.0)  | 0         | 0.1 (0.1)  | 0.1 (0.1)  | 0         | 0         |
| <b>Platyhelminthes</b>                                  |            |           |            |            |           |           |
| <i>Notoplana automata</i> (Müller OF, 1776)             | 0.9 (0.2)  | 1.8 (0.3) | 1.6 (0.3)  | 1.8 (0.5)  | 0.3 (0.1) | 1.7 (0.3) |
| <b>Nemertea</b>                                         |            |           |            |            |           |           |
| <i>Micrura</i> sp. (Ehrenberg, 1828)                    | 9.7 (1.0)  | 9.9 (0.9) | 10.9 (1.5) | 11.1 (1.2) | 8.8 (1.2) | 8.3 (1.4) |
| <b>Tunicata</b>                                         |            |           |            |            |           |           |
| <i>Boltenia</i> sp.                                     | 2.5 (0.6)  | 2.0 (0.5) | 1.6 (0.6)  | 0.6 (0.3)  | 4.3 (3.8) | 2.6 (0.8) |
| <i>Didemnum</i> sp. (Savigny, 1816)                     | x          | x         | x          | x          | x         | x         |
| <b>Sipuncula</b>                                        |            |           |            |            |           |           |
| <i>Phascolion (Phascolion) strombus</i> (Montagu, 1804) | 15.3 (2.1) | 4.1 (0.7) | 7.8 (0.2)  | 16.3 (3.8) | 6.4 (1.3) | 8.2 (2.1) |
| <b>Porifera</b>                                         |            |           |            |            |           |           |
| <i>Sycon</i> sp. (Risso, 1827)                          | x          | x         | x          | x          | x         | x         |
| Porifera indeterminate                                  | x          | x         | x          | x          | x         | x         |

### Supplement S3. SIMPER output

**Table S8.** Summary of SIMPER analysis for the substratum type assemblages. Dissim is the average ( $\pm$ SD) contribution of each species/Taxon to the overall dissimilarity between contrasted sites (SP15, SP18) or seasons. CumSum is the ordered cumulative contribution to overall dissimilarity. avgA and avgB are the average substratum type occurrence (square root transformed) for the first and second contrasted site/season, respectively.

| Substratum type         | Dissim | SD    | CumSum | avgA   | avgB   |
|-------------------------|--------|-------|--------|--------|--------|
| <b>SP15 vs SP18</b>     |        |       |        |        |        |
| Shell                   | 0.032  | 0.016 | 0.300  | 2.324  | 6.174  |
| Sediment                | 0.021  | 0.016 | 0.494  | 14.243 | 14.883 |
| Pebble                  | 0.019  | 0.014 | 0.672  | 6.153  | 5.146  |
| Dead rhodolith          | 0.012  | 0.009 | 0.788  | 10.034 | 9.125  |
| Live rhodolith          | 0.012  | 0.008 | 0.900  | 25.284 | 24.785 |
| Cobble/boulder          | 0.011  | 0.011 | 1.000  | 0.827  | 0.916  |
| <b>Winter vs Spring</b> |        |       |        |        |        |
| Pebble                  | 0.030  | 0.020 | 0.250  | 6.560  | 4.120  |
| Shell                   | 0.020  | 0.020 | 0.480  | 4.030  | 4.890  |
| Sediment                | 0.020  | 0.010 | 0.660  | 16.430 | 14.370 |
| Dead rhodolith          | 0.010  | 0.010 | 0.770  | 8.960  | 10.200 |
| Live rhodolith          | 0.010  | 0.010 | 0.890  | 23.970 | 25.190 |
| Cobble/boulder          | 0.010  | 0.010 | 1.000  | 0.000  | 1.390  |
| <b>Winter vs Summer</b> |        |       |        |        |        |
| Shell                   | 0.020  | 0.020 | 0.250  | 4.030  | 5.130  |
| Sediment                | 0.020  | 0.010 | 0.470  | 16.430 | 14.670 |
| Pebble                  | 0.020  | 0.020 | 0.670  | 6.560  | 5.760  |
| Live rhodolith          | 0.010  | 0.010 | 0.800  | 23.970 | 24.760 |
| Dead rhodolith          | 0.010  | 0.010 | 0.910  | 8.960  | 9.780  |
| Cobble/boulder          | 0.010  | 0.010 | 1.000  | 0.000  | 1.030  |
| <b>Winter vs Fall</b>   |        |       |        |        |        |
| Sediment                | 0.030  | 0.020 | 0.290  | 16.430 | 12.790 |
| Pebble                  | 0.020  | 0.020 | 0.460  | 6.560  | 6.150  |
| Shell                   | 0.020  | 0.020 | 0.640  | 4.030  | 2.950  |
| Live rhodolith          | 0.020  | 0.010 | 0.810  | 23.970 | 26.210 |
| Dead rhodolith          | 0.010  | 0.010 | 0.920  | 8.960  | 9.370  |
| Cobble/boulder          | 0.010  | 0.010 | 1.000  | 0.000  | 1.070  |

| Substratum type         | Dissim | SD    | CumSum | avgA   | avgB   |
|-------------------------|--------|-------|--------|--------|--------|
| <b>Spring vs Summer</b> |        |       |        |        |        |
| Shell                   | 0.020  | 0.020 | 0.270  | 4.890  | 5.130  |
| Pebble                  | 0.020  | 0.010 | 0.470  | 4.120  | 5.760  |
| Sand                    | 0.010  | 0.010 | 0.630  | 14.370 | 14.670 |
| Cobble/boulder          | 0.010  | 0.010 | 0.780  | 1.390  | 1.030  |
| Dead rhodolith          | 0.010  | 0.010 | 0.900  | 10.200 | 9.780  |
| Live rhodolith          | 0.010  | 0.010 | 1.000  | 25.190 | 24.760 |
| <b>Spring vs Fall</b>   |        |       |        |        |        |
| Shell                   | 0.020  | 0.020 | 0.220  | 4.890  | 2.950  |
| Sand                    | 0.020  | 0.020 | 0.430  | 14.370 | 12.790 |
| Pebble                  | 0.020  | 0.010 | 0.630  | 4.120  | 6.150  |
| Dead rhodolith          | 0.010  | 0.010 | 0.770  | 10.200 | 9.370  |
| Cobble/boulder          | 0.010  | 0.010 | 0.900  | 1.390  | 1.070  |
| Live rhodolith          | 0.010  | 0.010 | 1.000  | 25.190 | 26.210 |
| <b>Summer vs Fall</b>   |        |       |        |        |        |
| Sand                    | 0.020  | 0.020 | 0.240  | 14.670 | 12.790 |
| Shell                   | 0.020  | 0.020 | 0.480  | 5.130  | 2.950  |
| Dead rhodolith          | 0.010  | 0.010 | 0.610  | 9.780  | 9.370  |
| Live rhodolith          | 0.010  | 0.010 | 0.750  | 24.760 | 26.210 |
| Pebble                  | 0.010  | 0.010 | 0.880  | 5.760  | 6.150  |
| Cobble/boulder          | 0.010  | 0.010 | 1.000  | 1.030  | 1.070  |

**Table S9.** Summary of SIMPER analysis for the rhodolith shape assemblages. Dissim is the average ( $\pm$ SD) contribution of each species/Taxon to the overall dissimilarity between contrasted sites (SP15, SP18) or seasons. CumSum is the ordered cumulative contribution to overall dissimilarity. avgA and avgB are the average substratum type occurrence (square root transformed) for the first and second contrasted site/season, respectively.

| Rhodolith shape         | Dissim | SD    | CumSum | avgA  | avgB  |
|-------------------------|--------|-------|--------|-------|-------|
| <b>SP15 vs SP18</b>     |        |       |        |       |       |
| Compact                 | 0.057  | 0.047 | 0.348  | 6.968 | 6.710 |
| Bladed                  | 0.040  | 0.034 | 0.595  | 3.230 | 3.959 |
| Elongate                | 0.034  | 0.028 | 0.805  | 1.988 | 2.512 |
| Platy                   | 0.032  | 0.025 | 1.000  | 1.685 | 2.076 |
| <b>Winter vs Spring</b> |        |       |        |       |       |
| Compact                 | 0.062  | 0.049 | 0.384  | 7.072 | 6.276 |
| Bladed                  | 0.043  | 0.031 | 0.651  | 3.103 | 3.594 |
| Elongate                | 0.029  | 0.024 | 0.829  | 1.880 | 1.894 |
| Platy                   | 0.028  | 0.022 | 1.000  | 1.710 | 1.819 |
| <b>Winter vs Summer</b> |        |       |        |       |       |
| Compact                 | 0.062  | 0.047 | 0.332  | 7.072 | 6.495 |
| Bladed                  | 0.050  | 0.040 | 0.598  | 3.103 | 4.121 |
| Elongate                | 0.040  | 0.032 | 0.813  | 1.880 | 2.733 |
| Platy                   | 0.035  | 0.026 | 1.000  | 1.710 | 2.240 |
| <b>Winter vs Fall</b>   |        |       |        |       |       |
| Compact                 | 0.059  | 0.051 | 0.359  | 7.072 | 7.512 |
| Bladed                  | 0.038  | 0.026 | 0.593  | 3.103 | 3.559 |
| Elongate                | 0.036  | 0.030 | 0.809  | 1.880 | 2.494 |
| Platy                   | 0.031  | 0.025 | 1.000  | 1.710 | 1.752 |
| <b>Spring vs Summer</b> |        |       |        |       |       |
| Compact                 | 0.050  | 0.039 | 0.320  | 6.276 | 6.495 |
| Bladed                  | 0.038  | 0.036 | 0.563  | 3.594 | 4.121 |
| Elongate                | 0.036  | 0.027 | 0.796  | 1.894 | 2.733 |
| Platy                   | 0.032  | 0.022 | 1.000  | 1.819 | 2.240 |
| <b>Spring vs Fall</b>   |        |       |        |       |       |
| Compact                 | 0.056  | 0.047 | 0.376  | 6.276 | 7.512 |
| Elongate                | 0.032  | 0.025 | 0.592  | 1.894 | 2.494 |
| Bladed                  | 0.031  | 0.024 | 0.801  | 3.594 | 3.559 |
| Platy                   | 0.029  | 0.024 | 1.000  | 1.819 | 1.752 |

| Rhodolith shape       | Dissim | SD    | CumSum | avgA  | avgB  |
|-----------------------|--------|-------|--------|-------|-------|
| <b>Summer vs Fall</b> |        |       |        |       |       |
| Compact               | 0.056  | 0.043 | 0.348  | 6.495 | 7.512 |
| Bladed                | 0.036  | 0.034 | 0.572  | 4.121 | 3.559 |
| Platy                 | 0.036  | 0.027 | 0.792  | 2.240 | 1.752 |
| Elongate              | 0.034  | 0.025 | 1.000  | 2.733 | 2.494 |

**Table S10.** Summary of SIMPER analysis for macrofaunal community. Dissim is the average ( $\pm$ SD) contribution of each species/taxon to the overall dissimilarity between contrasted sites (SP15, SP18) or seasons. CumSum is the ordered cumulative contribution to overall dissimilarity. avgA and avgB are the average species/taxon abundances (square root transformed) for the first and second contrasted site/season, respectively.

| Species/taxa                             | Dissim | SD    | CumSum | avgA    | avgB    |
|------------------------------------------|--------|-------|--------|---------|---------|
| <b>SP15 vs SP18</b>                      |        |       |        |         |         |
| <i>Ophiura robusta</i>                   | 0.065  | 0.048 | 0.163  | 137.222 | 148.306 |
| <i>Ophiopholis aculeata</i>              | 0.063  | 0.052 | 0.320  | 119.056 | 102.639 |
| <i>Tonicella marmorea</i>                | 0.044  | 0.034 | 0.429  | 117.333 | 77.444  |
| <i>Hiatella arctica</i>                  | 0.023  | 0.017 | 0.486  | 48.306  | 30.528  |
| Sabellidae                               | 0.021  | 0.019 | 0.540  | 34.333  | 29.472  |
| <i>Puncturella noachina</i>              | 0.019  | 0.014 | 0.586  | 41.250  | 33.528  |
| <i>Stenosemus albus</i>                  | 0.015  | 0.011 | 0.623  | 20.944  | 34.056  |
| <i>Dexamine thea</i>                     | 0.013  | 0.011 | 0.655  | 20.389  | 4.861   |
| <i>Strongilocentrotus droebachiensis</i> | 0.009  | 0.007 | 0.678  | 26.250  | 24.389  |
| Phascolionidae                           | 0.009  | 0.008 | 0.700  | 15.278  | 4.056   |
| Cirratulidae                             | 0.008  | 0.006 | 0.720  | 16.306  | 8.361   |
| Terebellidae                             | 0.007  | 0.006 | 0.738  | 14.944  | 13.361  |
| <i>Asterias rubens</i>                   | 0.007  | 0.005 | 0.754  | 17.444  | 12.806  |
| <i>Munna</i> sp.                         | 0.006  | 0.007 | 0.770  | 6.417   | 7.417   |
| Isopoda.sp.                              | 0.006  | 0.006 | 0.786  | 6.639   | 7.500   |
| <i>Moelleria costulata</i>               | 0.006  | 0.006 | 0.802  | 12.083  | 9.000   |
| Orbiniidae                               | 0.006  | 0.005 | 0.817  | 11.722  | 5.000   |
| Phyllodocidae                            | 0.006  | 0.006 | 0.833  | 11.667  | 5.250   |
| <i>Boreocingula castanea</i>             | 0.006  | 0.006 | 0.847  | 9.861   | 2.694   |
| <i>Micrura</i> sp.                       | 0.005  | 0.004 | 0.859  | 9.694   | 9.889   |
| <i>Margarites</i> spp.                   | 0.004  | 0.003 | 0.870  | 10.306  | 7.000   |
| Ostracoda sp.                            | 0.004  | 0.004 | 0.880  | 6.167   | 1.167   |
| <i>Crassikorophium bonelli</i>           | 0.003  | 0.004 | 0.889  | 4.944   | 1.444   |
| Nudibranchia sp.                         | 0.003  | 0.003 | 0.897  | 4.833   | 4.778   |
| Maldanidae                               | 0.003  | 0.002 | 0.904  | 4.611   | 5.556   |

|                                  |       |       |       |       |       |
|----------------------------------|-------|-------|-------|-------|-------|
| Syllidae                         | 0.002 | 0.003 | 0.910 | 3.528 | 1.333 |
| Capitellidae                     | 0.002 | 0.002 | 0.916 | 3.694 | 2.861 |
| <i>Boltenia</i> sp.              | 0.002 | 0.002 | 0.922 | 2.528 | 2.000 |
| <i>Modiolus modiolus</i>         | 0.002 | 0.002 | 0.927 | 3.361 | 1.278 |
| <i>Heteranomia squamula</i>      | 0.002 | 0.002 | 0.933 | 2.778 | 2.444 |
| <i>Testudinalia testudinalis</i> | 0.002 | 0.002 | 0.938 | 2.056 | 3.667 |
| Hippolytidae                     | 0.002 | 0.002 | 0.943 | 2.778 | 2.000 |
| <i>Ecrobia truncata</i>          | 0.002 | 0.002 | 0.948 | 2.472 | 1.889 |
| Spionidae                        | 0.002 | 0.002 | 0.953 | 3.056 | 2.139 |
| Flabelligeridae                  | 0.002 | 0.002 | 0.957 | 2.306 | 2.083 |
| <i>Dacrydium vitreum</i>         | 0.002 | 0.002 | 0.962 | 2.417 | 1.306 |
| <i>Diaphana minuta</i>           | 0.002 | 0.002 | 0.966 | 2.139 | 2.361 |
| <i>Hardametopa carinata</i>      | 0.002 | 0.002 | 0.970 | 2.028 | 0.611 |
| Nereidae                         | 0.001 | 0.001 | 0.973 | 1.694 | 1.278 |
| <i>Velutina velutina</i>         | 0.001 | 0.001 | 0.977 | 1.917 | 1.361 |
| <i>Pleiolopha automata</i>       | 0.001 | 0.001 | 0.980 | 0.944 | 1.750 |
| <i>Crenella decussata</i>        | 0.001 | 0.001 | 0.982 | 1.639 | 0.500 |
| <i>Lacuna vincta</i>             | 0.001 | 0.001 | 0.985 | 1.083 | 0.778 |
| <i>Deflexilodes tessellatus</i>  | 0.001 | 0.001 | 0.987 | 0.667 | 1.000 |
| <i>Turbonilla</i> sp             | 0.001 | 0.001 | 0.989 | 0.750 | 0.667 |
| Arenicolidae                     | 0.001 | 0.001 | 0.991 | 0.667 | 0.750 |
| <i>Pontogeneia inermis</i>       | 0.001 | 0.001 | 0.993 | 0.333 | 0.694 |
| Sphaerodoridae                   | 0.001 | 0.001 | 0.994 | 0.722 | 0.694 |
| <i>Pleusymtes glaber</i>         | 0.001 | 0.002 | 0.996 | 0.694 | 0.278 |
| Scalibregmidae                   | 0.001 | 0.001 | 0.997 | 0.861 | 0.056 |
| Serpulidae                       | 0.001 | 0.001 | 0.999 | 0.694 | 0.222 |
| Pectinariidae                    | 0.000 | 0.001 | 1.000 | 0.472 | 0.417 |

#### Winter vs Spring

|                                          |       |       |       |         |         |
|------------------------------------------|-------|-------|-------|---------|---------|
| <i>Ophiura robusta</i>                   | 0.069 | 0.050 | 0.179 | 131.444 | 169.944 |
| <i>Ophiopholis aculeata</i>              | 0.050 | 0.039 | 0.311 | 97.833  | 103.611 |
| <i>Tonicella marmorea</i>                | 0.047 | 0.035 | 0.433 | 93.500  | 127.778 |
| Sabellidae                               | 0.024 | 0.021 | 0.496 | 24.889  | 50.000  |
| <i>Hiatella arctica</i>                  | 0.022 | 0.017 | 0.554 | 30.222  | 48.833  |
| <i>Puncturella noachina</i>              | 0.019 | 0.013 | 0.602 | 46.444  | 50.389  |
| <i>Stenosemus albus</i>                  | 0.014 | 0.012 | 0.639 | 20.278  | 32.000  |
| Phascolionidae                           | 0.010 | 0.010 | 0.665 | 7.778   | 16.278  |
| <i>Dexamine thea</i>                     | 0.009 | 0.008 | 0.689 | 15.944  | 2.778   |
| <i>Strongilocentrotus droebachiensis</i> | 0.009 | 0.007 | 0.711 | 23.667  | 26.667  |
| Terebellidae                             | 0.008 | 0.006 | 0.732 | 14.944  | 18.778  |
| Cirratulidae                             | 0.008 | 0.006 | 0.753 | 14.111  | 15.444  |
| <i>Moelleria costulata</i>               | 0.007 | 0.006 | 0.770 | 16.500  | 11.944  |

|                                  |       |       |       |         |         |
|----------------------------------|-------|-------|-------|---------|---------|
| Phyllodocidae                    | 0.007 | 0.006 | 0.788 | 9.389   | 13.778  |
| <i>Asterias rubens</i>           | 0.007 | 0.005 | 0.805 | 14.944  | 14.889  |
| Orbiniidae                       | 0.006 | 0.005 | 0.821 | 9.000   | 9.944   |
| <i>Munna</i> sp.                 | 0.005 | 0.004 | 0.834 | 8.278   | 1.056   |
| Isopoda.sp.                      | 0.005 | 0.004 | 0.847 | 8.333   | 1.500   |
| <i>Micrura</i> sp.               | 0.005 | 0.004 | 0.859 | 10.944  | 11.111  |
| <i>Boreocingula castanea</i>     | 0.004 | 0.004 | 0.871 | 6.722   | 5.556   |
| <i>Crassikorophium bonelli</i>   | 0.004 | 0.004 | 0.881 | 6.000   | 3.222   |
| <i>Margarites</i> spp.           | 0.003 | 0.003 | 0.890 | 8.667   | 8.556   |
| Ostracoda sp.                    | 0.003 | 0.003 | 0.898 | 3.444   | 3.778   |
| Nudibranchia.sp.                 | 0.003 | 0.002 | 0.906 | 5.111   | 1.278   |
| Capitellidae                     | 0.003 | 0.003 | 0.913 | 3.000   | 4.944   |
| <i>Modiolus modiolus</i>         | 0.003 | 0.002 | 0.920 | 4.722   | 2.833   |
| Syllidae                         | 0.003 | 0.002 | 0.927 | 2.944   | 3.556   |
| Maldanidae                       | 0.003 | 0.002 | 0.933 | 3.889   | 5.722   |
| <i>Heteranomia squamula</i>      | 0.002 | 0.003 | 0.939 | 1.556   | 3.056   |
| Hippolytidae                     | 0.002 | 0.002 | 0.944 | 2.944   | 2.222   |
| <i>Testudinalia testudinalis</i> | 0.002 | 0.002 | 0.949 | 3.278   | 3.500   |
| Spionidae                        | 0.002 | 0.002 | 0.954 | 3.889   | 2.667   |
| <i>Ecrobia truncata</i>          | 0.002 | 0.002 | 0.959 | 3.111   | 1.722   |
| Flabelligeridae                  | 0.002 | 0.001 | 0.963 | 2.778   | 1.167   |
| <i>Pleio plana automata</i>      | 0.001 | 0.001 | 0.966 | 1.556   | 1.778   |
| <i>Boltenia</i> sp               | 0.001 | 0.002 | 0.970 | 1.611   | 0.611   |
| <i>Velutina velutina</i>         | 0.001 | 0.001 | 0.973 | 1.778   | 1.833   |
| Nereidae                         | 0.001 | 0.001 | 0.976 | 1.167   | 1.667   |
| <i>Diaphana minuta</i>           | 0.001 | 0.001 | 0.978 | 1.944   | 1.278   |
| Arenicolidae                     | 0.001 | 0.001 | 0.981 | 0.556   | 1.667   |
| <i>Crenella decussata</i>        | 0.001 | 0.001 | 0.984 | 1.667   | 0.667   |
| <i>Dacrydium vitreum</i>         | 0.001 | 0.001 | 0.986 | 0.722   | 0.667   |
| Pectinariidae                    | 0.001 | 0.001 | 0.987 | 0.944   | 0.611   |
| <i>Hardametopa carinata</i>      | 0.001 | 0.001 | 0.989 | 0.944   | 0.500   |
| Sphaerodoridae                   | 0.001 | 0.001 | 0.991 | 0.889   | 0.611   |
| Scalibregmidae                   | 0.001 | 0.001 | 0.992 | 0.889   | 0.333   |
| Serpulidae                       | 0.001 | 0.001 | 0.994 | 0.444   | 0.722   |
| <i>Turbonilla</i> sp.            | 0.001 | 0.001 | 0.996 | 0.667   | 0.500   |
| <i>Deflexilodes tessellatus</i>  | 0.001 | 0.001 | 0.997 | 0.500   | 0.444   |
| <i>Lacuna vincta</i>             | 0.000 | 0.001 | 0.998 | 0.500   | 0.333   |
| <i>Pontogeneia inermis</i>       | 0.000 | 0.001 | 1.000 | 0.111   | 0.556   |
| <i>Pleusymtes glaber</i>         | 0.000 | 0.000 | 1.000 | 0.111   | 0.111   |
| <b>Winter vs Summer</b>          |       |       |       |         |         |
| <i>Ophiura robusta</i>           | 0.062 | 0.047 | 0.164 | 131.444 | 124.222 |

|                                          |       |       |       |        |        |
|------------------------------------------|-------|-------|-------|--------|--------|
| <i>Ophiopholis aculeata</i>              | 0.050 | 0.034 | 0.296 | 97.833 | 66.389 |
| <i>Tonicella marmorea</i>                | 0.041 | 0.027 | 0.404 | 93.500 | 84.556 |
| <i>Hiatella arctica</i>                  | 0.021 | 0.018 | 0.460 | 30.222 | 35.667 |
| <i>Puncturella noachina</i>              | 0.021 | 0.013 | 0.515 | 46.444 | 24.111 |
| Sabellidae                               | 0.015 | 0.011 | 0.555 | 24.889 | 17.833 |
| <i>Stenosemus albus</i>                  | 0.014 | 0.011 | 0.592 | 20.278 | 29.833 |
| <i>Dexamine thea</i>                     | 0.012 | 0.009 | 0.623 | 15.944 | 12.889 |
| <i>Strongilocentrotus droebachiensis</i> | 0.010 | 0.007 | 0.650 | 23.667 | 26.056 |
| <i>Moelleria costulata</i>               | 0.009 | 0.008 | 0.675 | 16.500 | 5.389  |
| Cirratulidae                             | 0.008 | 0.007 | 0.696 | 14.111 | 8.111  |
| Terebellidae                             | 0.008 | 0.006 | 0.716 | 14.944 | 9.167  |
| <i>Asterias rubens</i>                   | 0.007 | 0.005 | 0.735 | 14.944 | 14.944 |
| Phascolionidae                           | 0.006 | 0.005 | 0.751 | 7.778  | 6.389  |
| Isopoda.sp.                              | 0.006 | 0.005 | 0.766 | 8.333  | 2.278  |
| <i>Munna</i> sp.                         | 0.006 | 0.005 | 0.781 | 8.278  | 2.278  |
| Orbiniidae                               | 0.006 | 0.005 | 0.796 | 9.000  | 5.667  |
| <i>Micrura</i> sp.                       | 0.005 | 0.004 | 0.810 | 10.944 | 8.833  |
| Phyllodocidae                            | 0.005 | 0.006 | 0.824 | 9.389  | 5.944  |
| <i>Boreocingula castanea</i>             | 0.005 | 0.005 | 0.837 | 6.722  | 4.389  |
| <i>Crassikorophium bonelli</i>           | 0.004 | 0.004 | 0.849 | 6.000  | 2.111  |
| <i>Margarites</i> spp.                   | 0.004 | 0.003 | 0.860 | 8.667  | 8.000  |
| Ostracoda sp.                            | 0.004 | 0.004 | 0.870 | 3.444  | 3.500  |
| <i>Boltenia</i> sp                       | 0.003 | 0.003 | 0.879 | 1.611  | 4.278  |
| <i>Modiolus modiolus</i>                 | 0.003 | 0.002 | 0.887 | 4.722  | 1.056  |
| Syllidae                                 | 0.003 | 0.004 | 0.895 | 2.944  | 2.056  |
| Nudibranchia.sp.                         | 0.003 | 0.003 | 0.903 | 5.111  | 5.056  |
| Maldanidae                               | 0.003 | 0.003 | 0.910 | 3.889  | 4.778  |
| <i>Diaphana minuta</i>                   | 0.003 | 0.002 | 0.917 | 1.944  | 3.556  |
| Spionidae                                | 0.002 | 0.002 | 0.923 | 3.889  | 2.056  |
| Hippolytidae                             | 0.002 | 0.002 | 0.929 | 2.944  | 1.667  |
| Capitellidae                             | 0.002 | 0.002 | 0.935 | 3.000  | 2.444  |
| <i>Testudinalia testudinalis</i>         | 0.002 | 0.002 | 0.941 | 3.278  | 3.333  |
| Flabelligeridae                          | 0.002 | 0.002 | 0.947 | 2.778  | 1.667  |
| <i>Ecrobia truncata</i>                  | 0.002 | 0.002 | 0.952 | 3.111  | 0.556  |
| <i>Dacrydium vitreum</i>                 | 0.002 | 0.002 | 0.957 | 0.722  | 2.167  |
| <i>Heteranomia squamula</i>              | 0.002 | 0.002 | 0.961 | 1.556  | 1.889  |
| <i>Lacuna vincta</i>                     | 0.002 | 0.002 | 0.966 | 0.500  | 2.111  |
| <i>Hardametopa carinata</i>              | 0.002 | 0.002 | 0.970 | 0.944  | 1.833  |
| <i>Crenella decussata</i>                | 0.001 | 0.002 | 0.974 | 1.667  | 1.167  |
| Nereidae                                 | 0.001 | 0.001 | 0.977 | 1.167  | 1.389  |
| <i>Pleio plana automata</i>              | 0.001 | 0.001 | 0.980 | 1.556  | 0.333  |
| <i>Velutina velutina</i>                 | 0.001 | 0.001 | 0.983 | 1.778  | 0.889  |



|                                 |       |       |       |       |       |
|---------------------------------|-------|-------|-------|-------|-------|
| <i>Deflexilodes tessellatus</i> | 0.001 | 0.001 | 0.986 | 0.500 | 1.000 |
| <i>Pontogeneia inermis</i>      | 0.001 | 0.002 | 0.988 | 0.111 | 0.944 |
| Sphaerodoridae                  | 0.001 | 0.001 | 0.991 | 0.889 | 0.778 |
| Pectinariidae                   | 0.001 | 0.001 | 0.993 | 0.944 | 0.111 |
| <i>Turbonilla</i> sp.           | 0.001 | 0.001 | 0.995 | 0.667 | 0.778 |
| Scalibregmidae                  | 0.001 | 0.001 | 0.997 | 0.889 | 0.278 |
| Arenicolidae                    | 0.001 | 0.001 | 0.998 | 0.556 | 0.278 |
| Serpulidae                      | 0.000 | 0.001 | 0.999 | 0.444 | 0.056 |
| <i>Pleusymtes glaber</i>        | 0.000 | 0.001 | 1.000 | 0.111 | 0.167 |

### Winter vs Fall

|                                          |       |       |       |         |         |
|------------------------------------------|-------|-------|-------|---------|---------|
| <i>Ophiopholis aculeata</i>              | 0.082 | 0.064 | 0.194 | 97.833  | 175.556 |
| <i>Ophiura robusta</i>                   | 0.068 | 0.052 | 0.354 | 131.444 | 145.444 |
| <i>Tonicella marmorea</i>                | 0.038 | 0.029 | 0.445 | 93.500  | 83.722  |
| <i>Hiatella arctica</i>                  | 0.022 | 0.016 | 0.496 | 30.222  | 42.944  |
| Sabellidae                               | 0.021 | 0.018 | 0.546 | 24.889  | 34.889  |
| <i>Puncturella noachina</i>              | 0.021 | 0.016 | 0.594 | 46.444  | 28.611  |
| <i>Stenosemus albus</i>                  | 0.013 | 0.011 | 0.625 | 20.278  | 27.889  |
| <i>Dexamine thea</i>                     | 0.013 | 0.011 | 0.655 | 15.944  | 18.889  |
| <i>Strongilocentrotus droebachiensis</i> | 0.010 | 0.008 | 0.678 | 23.667  | 24.889  |
| Isopoda.sp.                              | 0.008 | 0.008 | 0.698 | 8.333   | 16.167  |
| <i>Munna</i> sp.                         | 0.008 | 0.008 | 0.718 | 8.278   | 16.056  |
| <i>Moelleria costulata</i>               | 0.008 | 0.008 | 0.738 | 16.500  | 8.333   |
| Cirratulidae                             | 0.008 | 0.007 | 0.756 | 14.111  | 11.667  |
| Terebellidae                             | 0.007 | 0.006 | 0.773 | 14.944  | 13.722  |
| <i>Asterias rubens</i>                   | 0.007 | 0.005 | 0.791 | 14.944  | 15.722  |
| <i>Boreocingula castanea</i>             | 0.006 | 0.007 | 0.806 | 6.722   | 8.444   |
| Orbiniidae                               | 0.006 | 0.005 | 0.821 | 9.000   | 8.833   |
| Phascolionidae                           | 0.006 | 0.005 | 0.835 | 7.778   | 8.222   |
| <i>Micrura</i> sp.                       | 0.005 | 0.004 | 0.848 | 10.944  | 8.278   |
| <i>Margarites</i> spp.                   | 0.005 | 0.004 | 0.859 | 8.667   | 9.389   |
| Phyllodocidae                            | 0.004 | 0.004 | 0.869 | 9.389   | 4.722   |
| <i>Crassicorophium bonelli</i>           | 0.004 | 0.004 | 0.879 | 6.000   | 1.444   |
| Nudibranchia.sp.                         | 0.004 | 0.003 | 0.888 | 5.111   | 7.778   |
| Ostracoda sp.                            | 0.004 | 0.004 | 0.897 | 3.444   | 3.944   |
| <i>Modiolus modiolus</i>                 | 0.003 | 0.003 | 0.904 | 4.722   | 0.667   |
| Maldanidae                               | 0.003 | 0.002 | 0.910 | 3.889   | 5.944   |
| <i>Ecrobia truncata</i>                  | 0.003 | 0.003 | 0.917 | 3.111   | 3.333   |
| Hippolytidae                             | 0.002 | 0.002 | 0.923 | 2.944   | 2.722   |
| <i>Heteranomia squamula</i>              | 0.002 | 0.002 | 0.928 | 1.556   | 3.944   |
| <i>Dacrydium vitreum</i>                 | 0.002 | 0.002 | 0.934 | 0.722   | 3.889   |
| Capitellidae                             | 0.002 | 0.002 | 0.939 | 3.000   | 2.722   |

|                                  |       |       |       |       |       |
|----------------------------------|-------|-------|-------|-------|-------|
| Flabelligeridae                  | 0.002 | 0.002 | 0.944 | 2.778 | 3.167 |
| <i>Boltenia</i> sp.              | 0.002 | 0.002 | 0.949 | 1.611 | 2.556 |
| Spionidae                        | 0.002 | 0.002 | 0.954 | 3.889 | 1.778 |
| Syllidae                         | 0.002 | 0.002 | 0.959 | 2.944 | 1.167 |
| <i>Testudinalia testudinalis</i> | 0.002 | 0.002 | 0.964 | 3.278 | 1.333 |
| <i>Diaphana minuta</i>           | 0.002 | 0.001 | 0.968 | 1.944 | 2.222 |
| <i>Velutina velutina</i>         | 0.001 | 0.001 | 0.972 | 1.778 | 2.056 |
| <i>Hardametopa carinata</i>      | 0.001 | 0.001 | 0.975 | 0.944 | 2.000 |
| Nereidae                         | 0.001 | 0.001 | 0.978 | 1.167 | 1.722 |
| <i>Pleiolana automata</i>        | 0.001 | 0.001 | 0.981 | 1.556 | 1.722 |
| <i>Crenella decussata</i>        | 0.001 | 0.001 | 0.983 | 1.667 | 0.778 |
| <i>Pleusymtes glaber</i>         | 0.001 | 0.002 | 0.986 | 0.111 | 1.556 |
| <i>Deflexilodes tessellatus</i>  | 0.001 | 0.001 | 0.989 | 0.500 | 1.389 |
| <i>Turbonilla</i> sp.            | 0.001 | 0.001 | 0.990 | 0.667 | 0.889 |
| Pectinariidae                    | 0.001 | 0.001 | 0.992 | 0.944 | 0.111 |
| Scalibregmidae                   | 0.001 | 0.001 | 0.994 | 0.889 | 0.333 |
| Sphaerodoridae                   | 0.001 | 0.001 | 0.995 | 0.889 | 0.556 |
| <i>Lacuna vincta</i>             | 0.001 | 0.001 | 0.997 | 0.500 | 0.778 |
| Serpulidae                       | 0.001 | 0.001 | 0.998 | 0.444 | 0.611 |
| Arenicolidae                     | 0.000 | 0.001 | 0.999 | 0.556 | 0.333 |
| <i>Pontogeneia inermis</i>       | 0.000 | 0.000 | 1.000 | 0.111 | 0.444 |

### Spring vs Summer

|                                          |       |       |       |         |         |
|------------------------------------------|-------|-------|-------|---------|---------|
| <i>Ophiura robusta</i>                   | 0.067 | 0.047 | 0.181 | 169.944 | 124.222 |
| <i>Ophiopholis aculeata</i>              | 0.048 | 0.037 | 0.309 | 103.611 | 66.389  |
| <i>Tonicella marmorea</i>                | 0.044 | 0.032 | 0.427 | 127.778 | 84.556  |
| Sabellidae                               | 0.026 | 0.021 | 0.498 | 50.000  | 17.833  |
| <i>Hiatella arctica</i>                  | 0.022 | 0.015 | 0.556 | 48.833  | 35.667  |
| <i>Puncturella noachina</i>              | 0.021 | 0.014 | 0.613 | 50.389  | 24.111  |
| <i>Stenosemus albus</i>                  | 0.014 | 0.010 | 0.651 | 32.000  | 29.833  |
| Phascolionidae                           | 0.010 | 0.010 | 0.677 | 16.278  | 6.389   |
| <i>Dexamine thea</i>                     | 0.009 | 0.007 | 0.700 | 2.778   | 12.889  |
| Terebellidae                             | 0.008 | 0.007 | 0.722 | 18.778  | 9.167   |
| <i>Strongilocentrotus droebachiensis</i> | 0.008 | 0.007 | 0.744 | 26.667  | 26.056  |
| Cirratulidae                             | 0.007 | 0.006 | 0.763 | 15.444  | 8.111   |
| Phyllodocidae                            | 0.007 | 0.006 | 0.783 | 13.778  | 5.944   |
| <i>Moelleria costulata</i>               | 0.006 | 0.004 | 0.798 | 11.944  | 5.389   |
| Orbiniidae                               | 0.006 | 0.005 | 0.813 | 9.944   | 5.667   |
| <i>Asterias rubens</i>                   | 0.005 | 0.004 | 0.826 | 14.889  | 14.944  |
| <i>Micrura</i> sp.                       | 0.004 | 0.003 | 0.838 | 11.111  | 8.833   |
| <i>Margarites</i> spp.                   | 0.004 | 0.003 | 0.848 | 8.556   | 8.000   |
| <i>Boreocingula castanea</i>             | 0.004 | 0.003 | 0.858 | 5.556   | 4.389   |

|                                  |       |       |       |       |       |
|----------------------------------|-------|-------|-------|-------|-------|
| Nudibranchia.sp.                 | 0.003 | 0.003 | 0.867 | 1.278 | 5.056 |
| <i>Boltenia</i> sp.              | 0.003 | 0.002 | 0.875 | 0.611 | 4.278 |
| Ostracoda sp.                    | 0.003 | 0.003 | 0.883 | 3.778 | 3.500 |
| Maldanidae                       | 0.003 | 0.002 | 0.891 | 5.722 | 4.778 |
| Syllidae                         | 0.003 | 0.003 | 0.898 | 3.556 | 2.056 |
| Capitellidae                     | 0.003 | 0.003 | 0.905 | 4.944 | 2.444 |
| <i>Crassikorophium bonelli</i>   | 0.002 | 0.002 | 0.912 | 3.222 | 2.111 |
| <i>Testudinalia testudinalis</i> | 0.002 | 0.002 | 0.918 | 3.500 | 3.333 |
| <i>Heteranomia squamula</i>      | 0.002 | 0.003 | 0.924 | 3.056 | 1.889 |
| <i>Diaphana minuta</i>           | 0.002 | 0.002 | 0.929 | 1.278 | 3.556 |
| <i>Modiolus modiolus</i>         | 0.002 | 0.002 | 0.934 | 2.833 | 1.056 |
| <i>Munna</i> sp.                 | 0.002 | 0.002 | 0.939 | 1.056 | 2.278 |
| Isopoda.sp.                      | 0.002 | 0.002 | 0.944 | 1.500 | 2.278 |
| Spionidae                        | 0.002 | 0.002 | 0.949 | 2.667 | 2.056 |
| Hippolytidae                     | 0.002 | 0.002 | 0.954 | 2.222 | 1.667 |
| <i>Lacuna vincta</i>             | 0.002 | 0.001 | 0.958 | 0.333 | 2.111 |
| <i>Dacrydium vitreum</i>         | 0.001 | 0.002 | 0.962 | 0.667 | 2.167 |
| Nereidae                         | 0.001 | 0.001 | 0.965 | 1.667 | 1.389 |
| <i>Hardametopa carinata</i>      | 0.001 | 0.001 | 0.969 | 0.500 | 1.833 |
| Flabelligeridae                  | 0.001 | 0.001 | 0.972 | 1.167 | 1.667 |
| <i>Pleioiplana automata</i>      | 0.001 | 0.001 | 0.976 | 1.778 | 0.333 |
| Arenicolidae                     | 0.001 | 0.001 | 0.979 | 1.667 | 0.278 |
| <i>Velutina velutina</i>         | 0.001 | 0.001 | 0.982 | 1.833 | 0.889 |
| <i>Ecrobia truncata</i>          | 0.001 | 0.001 | 0.984 | 1.722 | 0.556 |
| <i>Crenella decussata</i>        | 0.001 | 0.001 | 0.987 | 0.667 | 1.167 |
| <i>Pontogeneia inermis</i>       | 0.001 | 0.001 | 0.990 | 0.556 | 0.944 |
| <i>Deflexilodes tessellatus</i>  | 0.001 | 0.001 | 0.992 | 0.444 | 1.000 |
| Sphaerodoridae                   | 0.001 | 0.001 | 0.994 | 0.611 | 0.778 |
| <i>Turbonilla</i> sp.            | 0.001 | 0.001 | 0.996 | 0.500 | 0.778 |
| Serpulidae                       | 0.001 | 0.001 | 0.997 | 0.722 | 0.056 |
| Pectinariidae                    | 0.000 | 0.001 | 0.999 | 0.611 | 0.111 |
| Scalibregmidae                   | 0.000 | 0.000 | 0.999 | 0.333 | 0.278 |
| <i>Pleusymtes glaber</i>         | 0.000 | 0.000 | 1.000 | 0.111 | 0.167 |

### Spring vs Fall

|                             |       |       |       |         |         |
|-----------------------------|-------|-------|-------|---------|---------|
| <i>Ophiopholis aculeata</i> | 0.071 | 0.058 | 0.173 | 103.611 | 175.556 |
| <i>Ophiura robusta</i>      | 0.068 | 0.059 | 0.337 | 169.944 | 145.444 |
| <i>Tonicella marmorea</i>   | 0.042 | 0.037 | 0.440 | 127.778 | 83.722  |
| Sabellidae                  | 0.026 | 0.021 | 0.503 | 50.000  | 34.889  |
| <i>Hiatella arctica</i>     | 0.022 | 0.017 | 0.557 | 48.833  | 42.944  |
| <i>Puncturella noachina</i> | 0.020 | 0.016 | 0.606 | 50.389  | 28.611  |
| <i>Stenosemus albus</i>     | 0.014 | 0.012 | 0.641 | 32.000  | 27.889  |

|                                          |       |       |       |        |        |
|------------------------------------------|-------|-------|-------|--------|--------|
| <i>Dexamine thea</i>                     | 0.011 | 0.010 | 0.667 | 2.778  | 18.889 |
| <i>Munna</i> sp.                         | 0.010 | 0.007 | 0.691 | 1.056  | 16.056 |
| <i>Isopoda</i> .sp.                      | 0.010 | 0.007 | 0.714 | 1.500  | 16.167 |
| Phascolionidae                           | 0.009 | 0.009 | 0.737 | 16.278 | 8.222  |
| <i>Strongilocentrotus droebachiensis</i> | 0.009 | 0.009 | 0.758 | 26.667 | 24.889 |
| Terebellidae                             | 0.008 | 0.006 | 0.777 | 18.778 | 13.722 |
| Cirratulidae                             | 0.007 | 0.006 | 0.793 | 15.444 | 11.667 |
| Phyllodocidae                            | 0.007 | 0.006 | 0.809 | 13.778 | 4.722  |
| Orbiniidae                               | 0.006 | 0.005 | 0.824 | 9.944  | 8.833  |
| <i>Asterias rubens</i>                   | 0.006 | 0.005 | 0.838 | 14.889 | 15.722 |
| <i>Boreocingula castanea</i>             | 0.005 | 0.006 | 0.851 | 5.556  | 8.444  |
| <i>Moelleria costulata</i>               | 0.005 | 0.004 | 0.863 | 11.944 | 8.333  |
| <i>Micrura</i> sp                        | 0.005 | 0.004 | 0.875 | 11.111 | 8.278  |
| <i>Nudibranchia</i> .sp.                 | 0.004 | 0.003 | 0.886 | 1.278  | 7.778  |
| <i>Margarites</i> spp.                   | 0.004 | 0.003 | 0.896 | 8.556  | 9.389  |
| Ostracoda sp.                            | 0.003 | 0.003 | 0.903 | 3.778  | 3.944  |
| Maldanidae                               | 0.003 | 0.002 | 0.910 | 5.722  | 5.944  |
| <i>Heteranomia squamula</i>              | 0.002 | 0.002 | 0.916 | 3.056  | 3.944  |
| Capitellidae                             | 0.002 | 0.002 | 0.921 | 4.944  | 2.722  |
| <i>Testudinalia testudinalis</i>         | 0.002 | 0.002 | 0.926 | 3.500  | 1.333  |
| <i>Crassikorophium bonelli</i>           | 0.002 | 0.002 | 0.931 | 3.222  | 1.444  |
| <i>Ecobia truncata</i>                   | 0.002 | 0.002 | 0.936 | 1.722  | 3.333  |
| <i>Dacrydium vitreum</i>                 | 0.002 | 0.002 | 0.941 | 0.667  | 3.889  |
| Syllidae                                 | 0.002 | 0.002 | 0.946 | 3.556  | 1.167  |
| Hippolytidae                             | 0.002 | 0.002 | 0.951 | 2.222  | 2.722  |
| Flabelligeridae                          | 0.002 | 0.002 | 0.955 | 1.167  | 3.167  |
| <i>Modiolus modiolus</i>                 | 0.002 | 0.002 | 0.959 | 2.833  | 0.667  |
| <i>Boltenia</i> sp.                      | 0.002 | 0.002 | 0.963 | 0.611  | 2.556  |
| Spionidae                                | 0.002 | 0.002 | 0.967 | 2.667  | 1.778  |
| Nereidae                                 | 0.001 | 0.001 | 0.970 | 1.667  | 1.722  |
| <i>Velutina velutina</i>                 | 0.001 | 0.001 | 0.973 | 1.833  | 2.056  |
| <i>Diaphana minuta</i>                   | 0.001 | 0.001 | 0.976 | 1.278  | 2.222  |
| <i>Hardametopa carinata</i>              | 0.001 | 0.001 | 0.979 | 0.500  | 2.000  |
| <i>Pleioplana automata</i>               | 0.001 | 0.001 | 0.982 | 1.778  | 1.722  |
| Arenicolidae                             | 0.001 | 0.001 | 0.985 | 1.667  | 0.333  |
| <i>Pleusymtes glaber</i>                 | 0.001 | 0.002 | 0.987 | 0.111  | 1.556  |
| <i>Deflexilodes tessellatus</i>          | 0.001 | 0.001 | 0.989 | 0.444  | 1.389  |
| <i>Turbonilla</i> sp.                    | 0.001 | 0.001 | 0.991 | 0.500  | 0.889  |
| Serpulidae                               | 0.001 | 0.001 | 0.993 | 0.722  | 0.611  |
| <i>Crenella decussata</i>                | 0.001 | 0.001 | 0.994 | 0.667  | 0.778  |
| <i>Pontogeneia inermis</i>               | 0.001 | 0.001 | 0.996 | 0.556  | 0.444  |
| <i>Lacuna vincta</i>                     | 0.001 | 0.001 | 0.997 | 0.333  | 0.778  |

|                |       |       |       |       |       |
|----------------|-------|-------|-------|-------|-------|
| Sphaerodoridae | 0.000 | 0.001 | 0.998 | 0.611 | 0.556 |
| Pectinariidae  | 0.000 | 0.001 | 0.999 | 0.611 | 0.111 |
| Scalibregmidae | 0.000 | 0.000 | 1.000 | 0.333 | 0.333 |

#### Summer vs Fall

|                                          |       |       |       |         |         |
|------------------------------------------|-------|-------|-------|---------|---------|
| <i>Ophiopholis aculeata</i>              | 0.086 | 0.063 | 0.209 | 66.389  | 175.556 |
| <i>Ophiura robusta</i>                   | 0.068 | 0.056 | 0.375 | 124.222 | 145.444 |
| <i>Tonicella marmorea</i>                | 0.034 | 0.029 | 0.457 | 84.556  | 83.722  |
| <i>Hiatella arctica</i>                  | 0.023 | 0.019 | 0.514 | 35.667  | 42.944  |
| Sabellidae                               | 0.021 | 0.018 | 0.565 | 17.833  | 34.889  |
| <i>Stenosemus albus</i>                  | 0.015 | 0.012 | 0.600 | 29.833  | 27.889  |
| <i>Puncturella noachina</i>              | 0.013 | 0.011 | 0.633 | 24.111  | 28.611  |
| <i>Dexamine thea</i>                     | 0.012 | 0.010 | 0.662 | 12.889  | 18.889  |
| Isopoda.sp.                              | 0.011 | 0.008 | 0.688 | 2.278   | 16.167  |
| <i>Munna</i> sp.                         | 0.011 | 0.008 | 0.715 | 2.278   | 16.056  |
| <i>Strongilocentrotus droebachiensis</i> | 0.011 | 0.010 | 0.741 | 26.056  | 24.889  |
| Cirratulidae                             | 0.006 | 0.005 | 0.756 | 8.111   | 11.667  |
| <i>Asterias rubens</i>                   | 0.006 | 0.005 | 0.771 | 14.944  | 15.722  |
| Terebellidae                             | 0.006 | 0.005 | 0.786 | 9.167   | 13.722  |
| <i>Boreocingula castanea</i>             | 0.006 | 0.007 | 0.800 | 4.389   | 8.444   |
| Orbiniidae                               | 0.006 | 0.005 | 0.814 | 5.667   | 8.833   |
| Phascolionidae                           | 0.005 | 0.004 | 0.827 | 6.389   | 8.222   |
| <i>Margarites</i> spp.                   | 0.005 | 0.004 | 0.839 | 8.000   | 9.389   |
| <i>Micrura</i> sp.                       | 0.005 | 0.004 | 0.851 | 8.833   | 8.278   |
| <i>Moelleria costulata</i>               | 0.004 | 0.004 | 0.862 | 5.389   | 8.333   |
| <i>Nudibranchia</i> .sp.                 | 0.004 | 0.003 | 0.872 | 5.056   | 7.778   |
| Phyllodocidae                            | 0.004 | 0.005 | 0.880 | 5.944   | 4.722   |
| Ostracoda sp.                            | 0.004 | 0.004 | 0.889 | 3.500   | 3.944   |
| Maldanidae                               | 0.003 | 0.002 | 0.897 | 4.778   | 5.944   |
| <i>Boltenia</i> sp.                      | 0.003 | 0.002 | 0.904 | 4.278   | 2.556   |
| <i>Dacrydium vitreum</i>                 | 0.003 | 0.002 | 0.911 | 2.167   | 3.889   |
| <i>Diaphana minuta</i>                   | 0.002 | 0.002 | 0.917 | 3.556   | 2.222   |
| <i>Heteranomia squamula</i>              | 0.002 | 0.002 | 0.923 | 1.889   | 3.944   |
| <i>Testudinalia testudinalis</i>         | 0.002 | 0.002 | 0.929 | 3.333   | 1.333   |
| Flabelligeridae                          | 0.002 | 0.002 | 0.934 | 1.667   | 3.167   |
| <i>Ecrobia truncata</i>                  | 0.002 | 0.003 | 0.940 | 0.556   | 3.333   |
| Hippolytidae                             | 0.002 | 0.002 | 0.945 | 1.667   | 2.722   |
| Capitellidae                             | 0.002 | 0.002 | 0.949 | 2.444   | 2.722   |
| Syllidae                                 | 0.002 | 0.003 | 0.954 | 2.056   | 1.167   |
| <i>Crassikorophium bonelli</i>           | 0.002 | 0.002 | 0.958 | 2.111   | 1.444   |
| <i>Hardametopa carinata</i>              | 0.002 | 0.002 | 0.962 | 1.833   | 2.000   |
| Spionidae                                | 0.002 | 0.002 | 0.966 | 2.056   | 1.778   |

|                                 |       |       |       |       |       |
|---------------------------------|-------|-------|-------|-------|-------|
| <i>Lacuna vincta</i>            | 0.002 | 0.002 | 0.970 | 2.111 | 0.778 |
| Nereidae                        | 0.001 | 0.001 | 0.973 | 1.389 | 1.722 |
| <i>Velutina velutina</i>        | 0.001 | 0.001 | 0.977 | 0.889 | 2.056 |
| <i>Deflexilodes tessellatus</i> | 0.001 | 0.001 | 0.980 | 1.000 | 1.389 |
| <i>Pleioplanea automata</i>     | 0.001 | 0.001 | 0.983 | 0.333 | 1.722 |
| <i>Pleusymtes glaber</i>        | 0.001 | 0.002 | 0.986 | 0.167 | 1.556 |
| <i>Crenella decussata</i>       | 0.001 | 0.001 | 0.988 | 1.167 | 0.778 |
| <i>Modiolus modiolus</i>        | 0.001 | 0.001 | 0.991 | 1.056 | 0.667 |
| <i>Pontogeneia inermis</i>      | 0.001 | 0.001 | 0.993 | 0.944 | 0.444 |
| <i>Turbonilla</i> sp.           | 0.001 | 0.001 | 0.995 | 0.778 | 0.889 |
| Sphaerodoridae                  | 0.001 | 0.001 | 0.997 | 0.778 | 0.556 |
| Serpulidae                      | 0.000 | 0.001 | 0.998 | 0.056 | 0.611 |
| Arenicolidae                    | 0.000 | 0.001 | 0.999 | 0.278 | 0.333 |
| Scalibregmidae                  | 0.000 | 0.000 | 1.000 | 0.278 | 0.333 |
| Pectinariidae                   | 0.000 | 0.000 | 1.000 | 0.111 | 0.111 |

---
